# Supplementary material for: Pyridylporphyrins peripherally coordinated to ruthenium-nitrosyls, including the water-soluble Na4[Zn·4′TPyP{RuCl4(NO)}4]: synthesis and structural characterization
Source: Royal Society of Chemistry journal article supplement (doi:10.1039/b418855a), 2005-01-01
Supplement: b418855a.pdf [file b418855a.pdf]

---

**Pyridylporphyrins peripherally coordinated to ruthenium-nitrosyls,  
including the water-soluble  $\text{Na}_4[\text{Zn}\cdot 4'\text{TPyP}\{\text{RuCl}_4(\text{NO})\}_4]$ : synthesis and  
structural characterization.**

---

Teresa Gianferrara,<sup>a</sup> Barbara Serli,<sup>b</sup> Ennio Zangrando,<sup>b</sup> Elisabetta Iengo<sup>b</sup> and Enzo Alessio<sup>\*b</sup>

<sup>a</sup> *Dipartimento di Scienze Farmaceutiche, Università di Trieste, Piazzale Europa 1, 34127 Trieste, Italy.  
Fax: 040 52542; Tel: 040 5587859; E-mail: gianfer@univ.trieste.it*

<sup>b</sup> *Dipartimento di Scienze Chimiche, Università di Trieste, Via Giorgieri 1, 34127 Trieste, Italy. Fax: 040  
5583903; Tel: 040 5583961; E-mail: alessi@univ.trieste.it*

**Supplementary Information**

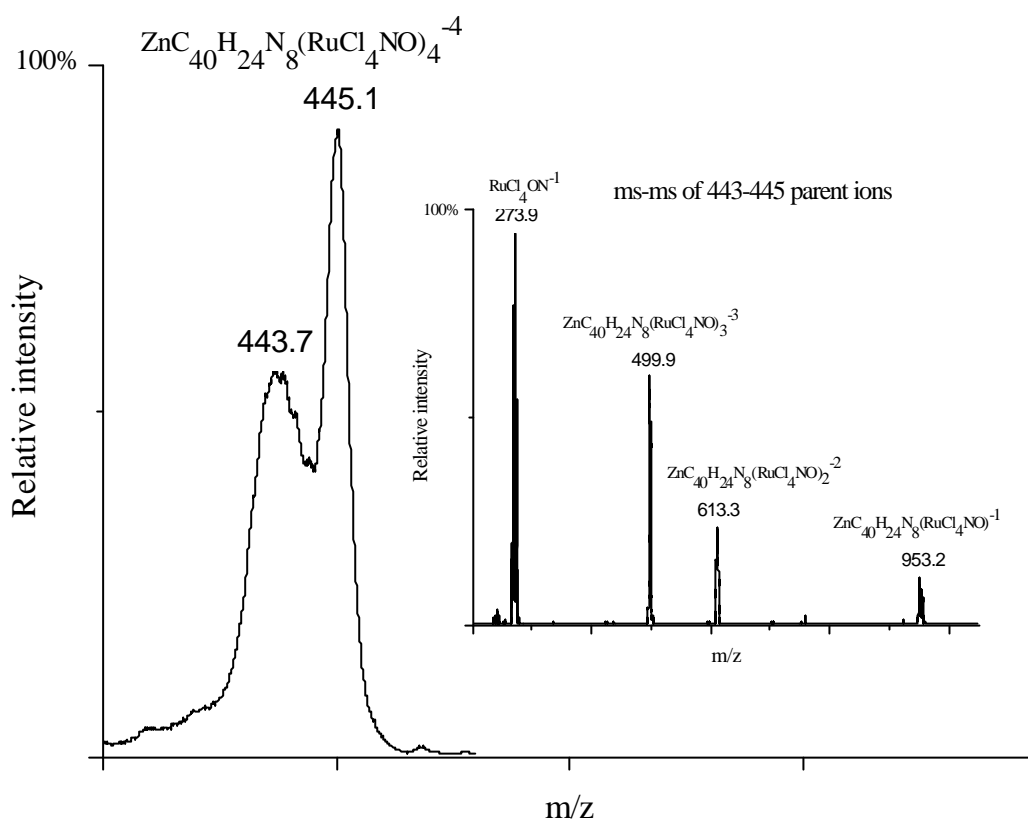

**Figure 1S.** ESI-MS and MS-MS (insert) of  $\text{Na}_4[(\text{Zn-4TPyP})\{\text{RuCl}_4(\text{NO})\}_4]$  (**6Zn**).

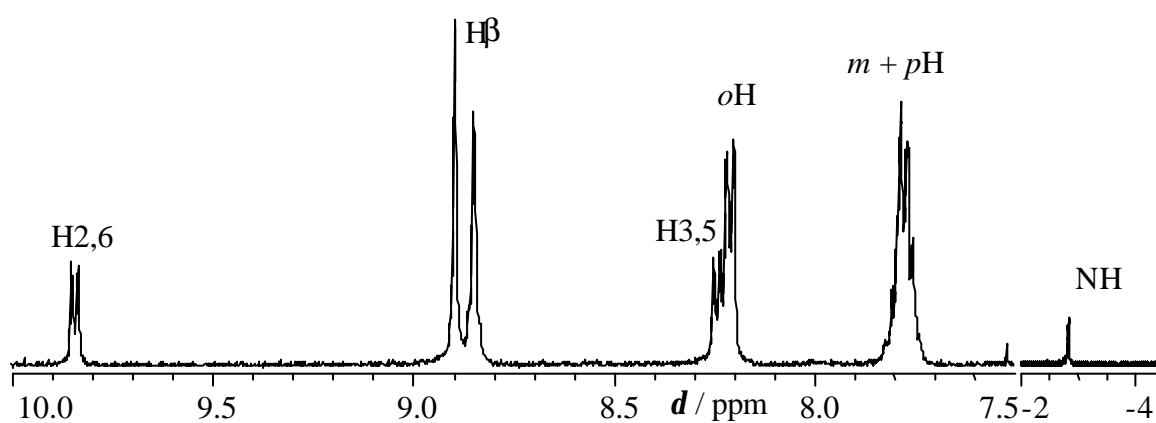

**Figure 2S.** <sup>1</sup>H NMR spectrum (CDCl<sub>3</sub>, 4'MPyP regions) of [nBu<sub>4</sub>N][*trans*-RuCl<sub>4</sub>(4'MPyP)(NO)] (1).

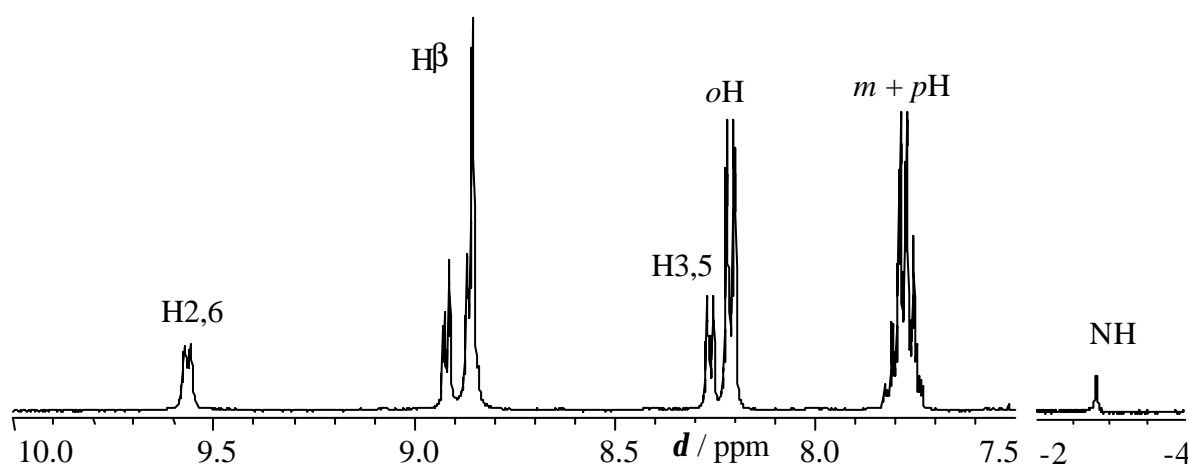

**Figure 3S.** <sup>1</sup>H NMR spectrum (CDCl<sub>3</sub>, 4'MPyP regions) of [nBu<sub>4</sub>N][*cis*-RuCl<sub>4</sub>(4'MPyP)(NO)] (2).

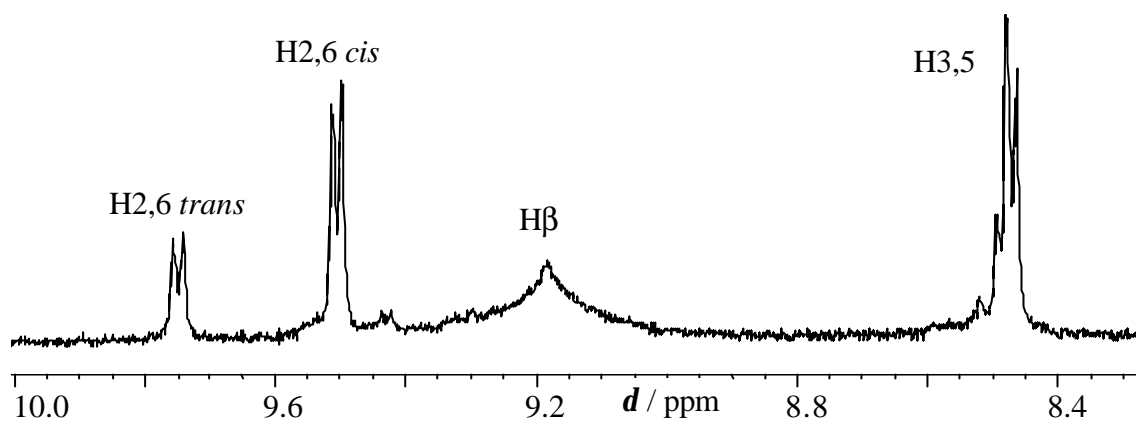

**Figure 4S.** <sup>1</sup>H NMR spectrum (CD<sub>3</sub>NO<sub>2</sub>, aromatic region) of [nBu<sub>4</sub>N]<sub>4</sub>[4'TPyP{RuCl<sub>4</sub>(NO)}<sub>4</sub>] (5).

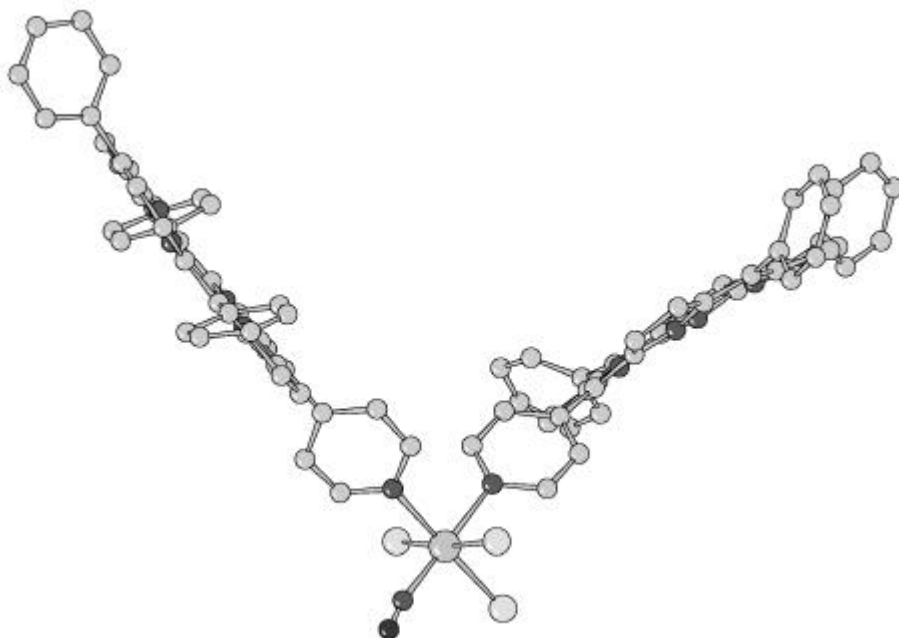

**Figure 5S.** Perspective view of [mer,cis-RuCl<sub>3</sub>(4'MPyP)<sub>2</sub>(NO)] (4) in the solid state, showing the mutual orientation and the distortions of the two porphyrins.

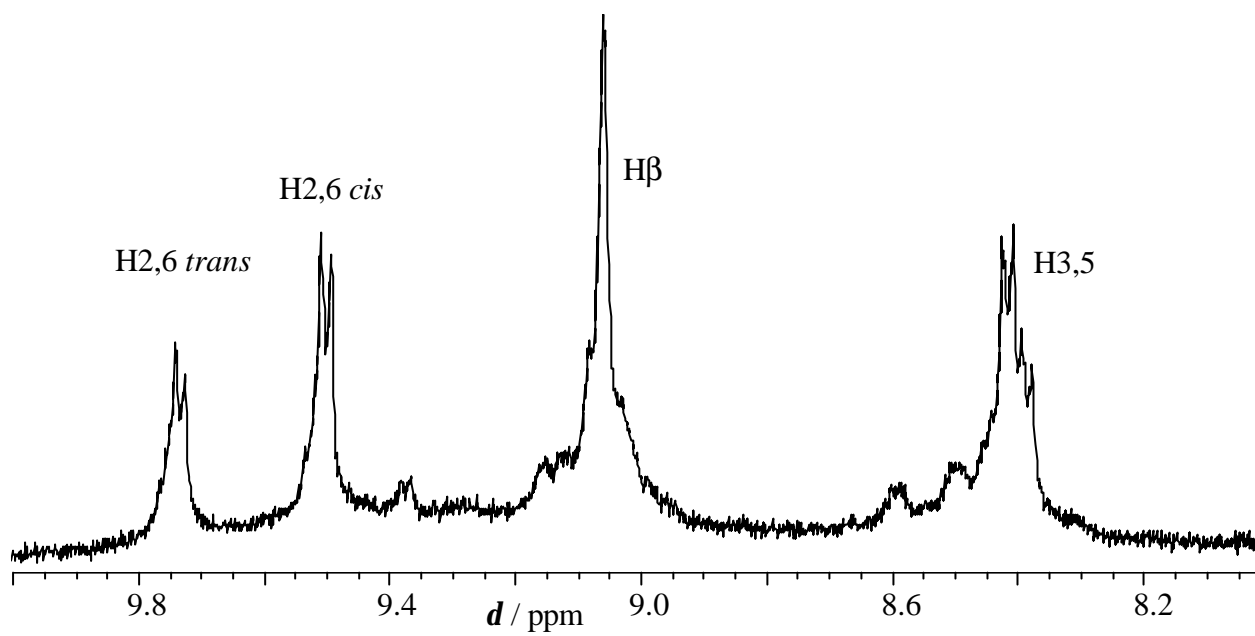

**Figure 6S.**  $^1\text{H}$  NMR spectrum ( $\text{CD}_3\text{OD}$ ) of  $\text{Na}_4[\text{Zn}\cdot 4'\text{TPyP}\{\text{RuCl}_4(\text{NO})\}_4]$  (**6Zn**).
